# Supplementary material for: Modeling environmental risk factors of autism in mice induces IBD-related gut microbial dysbiosis and hyperserotonemia
Source: PubMed Central journal article supplement (PMC5399341; doi:10.1186/s13041-017-0292-0), 2017-04-20

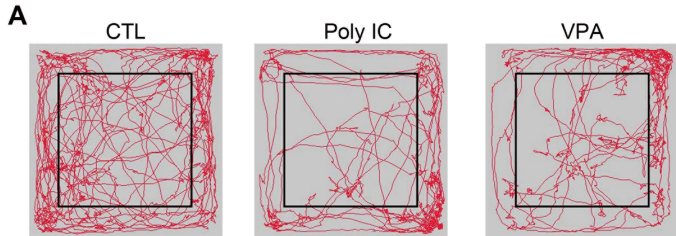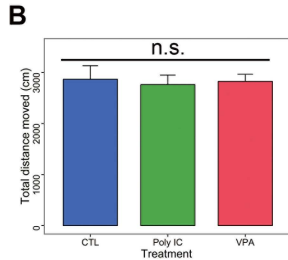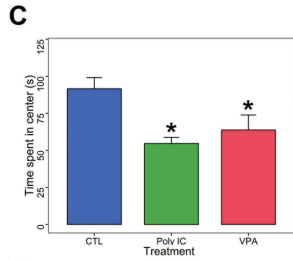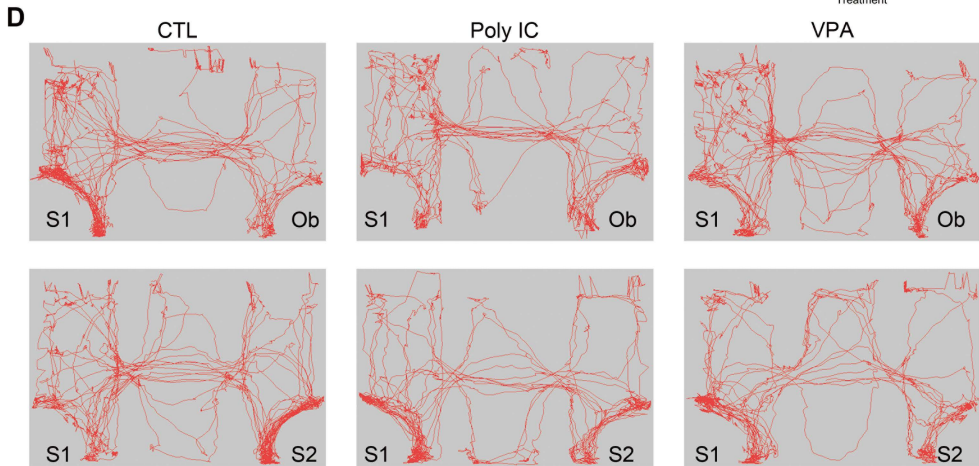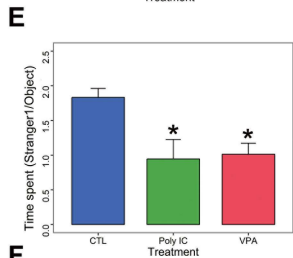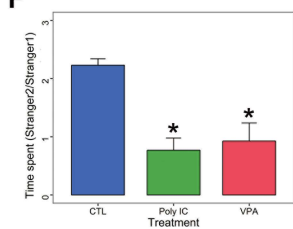

Supplement: 13041_2017_292_MOESM1_ESM.pdf [file 13041_2017_292_MOESM1_ESM.pdf]
